# Supplementary material
Source: MDPI journal article supplement (https://www.mdpi.com/1996-1073/16/12/4648)

**Table S1.** Comparison of the average annual outdoor temperature in accordance with [24] with average annual outdoor temperatures for meteorological stations located within the respective climate zones

| Climate zone | Location            | Design outdoor temperature $\theta_e$ [°C] | Average annual outdoor temperature for the climate zone $\theta_{e(r)}$ [°C] | Average annual outdoor temperature for the meteorological station $\theta_{e(r)}$ [°C] |
|--------------|---------------------|--------------------------------------------|------------------------------------------------------------------------------|----------------------------------------------------------------------------------------|
| I            | Gdańsk              | -16                                        | 7.7                                                                          | 8.7                                                                                    |
|              | Hel                 |                                            |                                                                              | 8.3                                                                                    |
|              | Kołobrzeg           |                                            |                                                                              | 8.4                                                                                    |
|              | Koszalin            |                                            |                                                                              | 8.0                                                                                    |
|              | Lębork              |                                            |                                                                              | 7.9                                                                                    |
|              | Łeba                |                                            |                                                                              | 7.9                                                                                    |
|              | Resko               |                                            |                                                                              | 8.4                                                                                    |
|              | Szczecin            |                                            |                                                                              | 8.8                                                                                    |
|              | Szczecinek          |                                            |                                                                              | 7.9                                                                                    |
|              | Świnoujście         |                                            |                                                                              | 8.9                                                                                    |
|              | Ustka               |                                            |                                                                              | 7.9                                                                                    |
| II           | Bydgoszcz           | -18                                        | 7.9                                                                          | 7.9                                                                                    |
|              | Chojnice            |                                            |                                                                              | 7.1                                                                                    |
|              | Elbląg              |                                            |                                                                              | 7.3                                                                                    |
|              | Gorzów Wielkopolski |                                            |                                                                              | 8.9                                                                                    |
|              | Kalisz              |                                            |                                                                              | 7.9                                                                                    |
|              | Koło                |                                            |                                                                              | 8.6                                                                                    |
|              | Legnica             |                                            |                                                                              | 9.0                                                                                    |
|              | Leszno              |                                            |                                                                              | 7.8                                                                                    |
|              | Piła                |                                            |                                                                              | 8.3                                                                                    |
|              | Poznań              |                                            |                                                                              | 8.2                                                                                    |
|              | Słubice             |                                            |                                                                              | 8.9                                                                                    |
|              | Sulejów             |                                            |                                                                              | 7.8                                                                                    |
|              | Wieluń              |                                            |                                                                              | 8.4                                                                                    |
|              | Wrocław             |                                            |                                                                              | 8.2                                                                                    |
|              | Zielona Góra        |                                            |                                                                              | 8.2                                                                                    |
| III          | Bielsko-Biała       | -20                                        | 7.6                                                                          | 8.5                                                                                    |
|              | Częstochowa         |                                            |                                                                              | 8.1                                                                                    |
|              | Jelenia Góra        |                                            |                                                                              | 7.5                                                                                    |
|              | Katowice            |                                            |                                                                              | 8.0                                                                                    |
|              | Kielce              |                                            |                                                                              | 7.5                                                                                    |
|              | Kłodzko             |                                            |                                                                              | 7.7                                                                                    |
|              | Kraków              |                                            |                                                                              | 8.2                                                                                    |
|              | Krosno              |                                            |                                                                              | 8.1                                                                                    |
|              | Lublin              |                                            |                                                                              | 7.7                                                                                    |
|              | Łódź                |                                            |                                                                              | 8.2                                                                                    |
|              | Mława               |                                            |                                                                              | 7.4                                                                                    |
|              | Nowy Sącz           |                                            |                                                                              | 8.5                                                                                    |
|              | Opole               |                                            |                                                                              | 8.9                                                                                    |
|              | Ostrołęka           |                                            |                                                                              | 7.7                                                                                    |
|              | Płock               |                                            |                                                                              | 8.3                                                                                    |
|              | Przemyśl            |                                            |                                                                              | 7.6                                                                                    |

| Climate zone | Location   | Design outdoor temperature $\theta_e$ [°C] | Average annual outdoor temperature for the climate zone $\theta_{e(r)}$ [°C] | Average annual outdoor temperature for the meteorological station $\theta_{e(r)}$ [°C] |
|--------------|------------|--------------------------------------------|------------------------------------------------------------------------------|----------------------------------------------------------------------------------------|
|              | Racibórz   |                                            |                                                                              | 8.7                                                                                    |
|              | Rzeszów    |                                            |                                                                              | 7.5                                                                                    |
|              | Sandomierz |                                            |                                                                              | 8.3                                                                                    |
|              | Tarnów     |                                            |                                                                              | 9.0                                                                                    |
|              | Toruń      |                                            |                                                                              | 8.1                                                                                    |
|              | Warszawa   |                                            |                                                                              | 8.2                                                                                    |
|              | Włodawa    |                                            |                                                                              | 7.6                                                                                    |
|              | Zamość     |                                            |                                                                              | 7.2                                                                                    |
| IV           | Białystok  | -22                                        | 6.9                                                                          | 6.9                                                                                    |
|              | Kętrzyn    |                                            |                                                                              | 7.1                                                                                    |
|              | Lesko      |                                            |                                                                              | 8.1                                                                                    |
|              | Mikołajki  |                                            |                                                                              | 7.1                                                                                    |
|              | Olsztyn    |                                            |                                                                              | 6.9                                                                                    |
|              | Siedlce    |                                            |                                                                              | 7.6                                                                                    |
|              | Terespol   |                                            |                                                                              | 7.8                                                                                    |
| V            | Suwałki    | -24                                        | 5.5                                                                          | 6.3                                                                                    |
|              | Zakopane   |                                            |                                                                              | 5.4                                                                                    |

**Table S2.** Number of heating days Ld [days/year] for meteorological stations and energy classes of buildings

| No. | Location            | Number of heating days Ld [days/year] |       |       |       |       |       |
|-----|---------------------|---------------------------------------|-------|-------|-------|-------|-------|
|     |                     | B3                                    | B2    | B1    | A3    | A2    | A1    |
| 1.  | Białystok           | 208.8                                 | 194.9 | 185.1 | 190.3 | 168.3 | 138.3 |
| 2.  | Bielsko-Biała       | 193.9                                 | 184.0 | 170.2 | 185.6 | 145.2 | 120.7 |
| 3.  | Bydgoszcz           | 216.4                                 | 199.6 | 190.5 | 193.8 | 170.6 | 145.9 |
| 4.  | Chojnice            | 224.8                                 | 204.7 | 193.6 | 197.7 | 176.6 | 152.0 |
| 5.  | Częstochowa         | 195.1                                 | 183.9 | 169.6 | 174.7 | 146.3 | 127.7 |
| 6.  | Elbląg              | 209.4                                 | 194.5 | 186.6 | 189.6 | 170.1 | 145.1 |
| 7.  | Gdańsk              | 205.7                                 | 188.3 | 177.0 | 182.0 | 156.2 | 136.8 |
| 8.  | Gorzów Wielkopolski | 202.7                                 | 189.6 | 177.9 | 183.8 | 161.1 | 138.7 |
| 9.  | Hel                 | 217.6                                 | 195.9 | 184.6 | 188.7 | 160.4 | 138.6 |
| 10. | Jelenia Góra        | 216.0                                 | 205.3 | 187.4 | 191.1 | 179.4 | 131.3 |
| 11. | Kalisz              | 201.2                                 | 188.9 | 181.3 | 185.1 | 159.9 | 139.3 |
| 12. | Katowice            | 194.4                                 | 182.6 | 168.0 | 174.3 | 145.3 | 129.8 |
| 13. | Kętrzyn             | 198.6                                 | 187.7 | 179.3 | 184.4 | 160.1 | 141.9 |
| 14. | Kielce              | 203.0                                 | 189.3 | 177.8 | 183.1 | 157.9 | 140.2 |
| 15. | Kłodzko             | 201.6                                 | 189.3 | 174.4 | 180.8 | 152.6 | 129.4 |
| 16. | Koło                | 194.6                                 | 181.9 | 169.7 | 174.1 | 149.0 | 130.9 |
| 17. | Kołobrzeg           | 210.9                                 | 196.3 | 188.5 | 191.4 | 179.5 | 137.1 |
| 18. | Koszalin            | 207.6                                 | 193.7 | 186.4 | 189.1 | 138.8 | 139.3 |
| 19. | Kraków              | 188.6                                 | 180.9 | 168.1 | 173.2 | 146.6 | 131.6 |
| 20. | Krosno              | 196.9                                 | 177.8 | 166.1 | 170.4 | 154.4 | 133.6 |
| 21. | Legnica             | 200.1                                 | 186.1 | 171.2 | 177.6 | 146.3 | 127.9 |
| 22. | Lesko               | 201.2                                 | 185.3 | 167.5 | 176.2 | 141.5 | 120.1 |
| 23. | Leszno              | 206.4                                 | 192.7 | 185.7 | 188.4 | 171.3 | 144.8 |

| No. | Location     | Number of heating days Ld [days/year] |       |       |       |       |       |
|-----|--------------|---------------------------------------|-------|-------|-------|-------|-------|
|     |              | B3                                    | B2    | B1    | A3    | A2    | A1    |
| 24. | Lębork       | 210.6                                 | 193.8 | 185.0 | 188.2 | 164.7 | 143.1 |
| 25. | Lublin       | 198.3                                 | 182.7 | 170.5 | 175.0 | 154.6 | 138.0 |
| 26. | Łeba         | 212.9                                 | 194.4 | 184.3 | 188.1 | 162.8 | 140.2 |
| 27. | Łódź         | 203.0                                 | 191.1 | 178.0 | 184.0 | 161.1 | 141.1 |
| 28. | Mikołajki    | 220.5                                 | 203.0 | 190.3 | 195.1 | 173.2 | 142.9 |
| 29. | Mława        | 210.2                                 | 195.7 | 183.8 | 189.8 | 166.3 | 149.0 |
| 30. | Nowy Sącz    | 196.2                                 | 181.9 | 169.8 | 174.2 | 161.4 | 134.9 |
| 31. | Olsztyn      | 217.8                                 | 201.0 | 191.9 | 195.3 | 179.6 | 159.9 |
| 32. | Opole        | 192.7                                 | 176.8 | 165.1 | 169.3 | 143.0 | 121.6 |
| 33. | Ostrołęka    | 212.3                                 | 198.7 | 187.8 | 193.8 | 169.9 | 157.6 |
| 34. | Piła         | 230.3                                 | 185.9 | 170.8 | 177.3 | 149.1 | 133.8 |
| 35. | Płock        | 194.1                                 | 186.4 | 173.1 | 178.1 | 151.5 | 133.7 |
| 36. | Poznań       | 198.8                                 | 184.8 | 172.7 | 177.1 | 160.1 | 144.5 |
| 37. | Przemyśl     | 191.5                                 | 177.4 | 167.0 | 170.7 | 151.5 | 134.4 |
| 38. | Racibórz     | 190.9                                 | 176.3 | 164.1 | 168.5 | 141.6 | 119.7 |
| 39. | Resko        | 206.5                                 | 188.5 | 177.3 | 182.3 | 145.0 | 122.1 |
| 40. | Rzeszów      | 196.0                                 | 183.9 | 172.8 | 176.9 | 161.3 | 141.9 |
| 41. | Sandomierz   | 195.1                                 | 182.1 | 169.7 | 174.2 | 152.2 | 133.8 |
| 42. | Siedlce      | 205.5                                 | 192.6 | 182.6 | 188.3 | 166.1 | 144.4 |
| 43. | Słubice      | 194.0                                 | 180.2 | 161.3 | 168.4 | 139.8 | 123.0 |
| 44. | Sulejów      | 207.0                                 | 192.1 | 180.2 | 186.0 | 161.3 | 140.2 |
| 45. | Suwałki      | 209.5                                 | 196.3 | 189.3 | 191.8 | 172.8 | 128.8 |
| 46. | Szczecin     | 202.3                                 | 189.6 | 179.4 | 185.2 | 163.1 | 138.1 |
| 47. | Szczecinek   | 221.8                                 | 200.2 | 188.6 | 193.0 | 168.5 | 142.1 |
| 48. | Świnoujście  | 198.5                                 | 183.9 | 171.4 | 176.0 | 144.0 | 122.6 |
| 49. | Tarnów       | 187.3                                 | 170.9 | 148.8 | 156.9 | 125.5 | 109.4 |
| 50. | Terespol     | 201.7                                 | 180.3 | 167.7 | 172.2 | 152.5 | 136.3 |
| 51. | Toruń        | 201.6                                 | 190.8 | 185.5 | 187.4 | 167.9 | 145.5 |
| 52. | Ustka        | 224.3                                 | 202.2 | 190.3 | 194.6 | 171.0 | 141.3 |
| 53. | Warszawa     | 206.4                                 | 192.3 | 185.2 | 187.9 | 160.7 | 133.1 |
| 54. | Wieluń       | 200.3                                 | 186.6 | 172.9 | 180.3 | 143.0 | 120.9 |
| 55. | Włodawa      | 200.2                                 | 186.2 | 172.8 | 177.7 | 154.3 | 138.0 |
| 56. | Wrocław      | 199.3                                 | 187.3 | 176.1 | 181.7 | 152.8 | 133.2 |
| 57. | Zakopane     | 229.8                                 | 207.6 | 195.2 | 199.7 | 178.2 | 159.8 |
| 58. | Zamość       | 209.4                                 | 194.1 | 186.1 | 189.0 | 166.0 | 145.7 |
| 59. | Zielona Góra | 200.9                                 | 187.2 | 174.9 | 179.4 | 162.0 | 150.6 |

**Table S3. Number of heating degree days HDD [K·day] for meteorological stations and energy classes of buildings**

| No. | Location            | Number of heating degree days HDD [K·day] |          |         |          |          |          |
|-----|---------------------|-------------------------------------------|----------|---------|----------|----------|----------|
|     |                     | B3                                        | B2       | B1      | A3       | A2       | A1       |
| 1.  | Białystok           | 3 885.20                                  | 3 730.45 | 3 605.0 | 3 671.43 | 3 389.05 | 2 933.85 |
| 2.  | Bielsko-Biała       | 3 345.82                                  | 3 230.26 | 3 066.1 | 3 241.36 | 2 740.52 | 2 389.42 |
| 3.  | Bydgoszcz           | 3 593.30                                  | 3 426.70 | 3 319.5 | 3 359.52 | 3 064.54 | 2 713.46 |
| 4.  | Chojnice            | 3 920.10                                  | 3 709.61 | 3 563.5 | 3 618.21 | 3 332.66 | 2 980.52 |
| 5.  | Częstochowa         | 3 469.62                                  | 3 341.06 | 3 172.4 | 3 232.58 | 2 870.74 | 2 593.22 |
| 6.  | Elbląg              | 3 731.68                                  | 3 544.62 | 3 443.3 | 3 481.76 | 3 225.94 | 2 868.96 |
| 7.  | Gdańsk              | 3 284.31                                  | 3 076.69 | 2 940.2 | 3 000.70 | 2 681.20 | 2 404.10 |
| 8.  | Gorzów Wielkopolski | 3 334.69                                  | 3 180.06 | 3 042.5 | 3 111.78 | 2 827.99 | 2 533.23 |
| 9.  | Hel                 | 3 526.98                                  | 3 276.07 | 3 131.7 | 3 184.05 | 2 827.57 | 2 510.74 |
| 10. | Jelenia Góra        | 3 650.65                                  | 3 539.40 | 3 310.6 | 3 358.05 | 3 204.62 | 2 536.94 |
| 11. | Kalisz              | 3 596.30                                  | 3 445.25 | 3 350.7 | 3 398.51 | 3 078.47 | 2 769.63 |
| 12. | Katowice            | 3 473.28                                  | 3 341.85 | 3 175.2 | 3 246.33 | 2 887.16 | 2 637.94 |
| 13. | Kętrzyn             | 3 750.28                                  | 3 621.85 | 3 522.6 | 3 582.98 | 3 291.77 | 3 023.58 |
| 14. | Kielce              | 3 650.60                                  | 3 487.95 | 3 348.7 | 3 413.25 | 3 094.85 | 2 822.70 |
| 15. | Kłodzko             | 3 553.04                                  | 3 404.39 | 3 218.8 | 3 298.68 | 2 922.58 | 2 600.38 |
| 16. | Koło                | 3 311.80                                  | 3 164.36 | 3 020.4 | 3 072.28 | 2 739.42 | 2 469.65 |
| 17. | Kołobrzeg           | 3 339.88                                  | 3 146.40 | 3 042.0 | 3 080.70 | 2 919.30 | 2 323.31 |
| 18. | Koszalin            | 3 469.59                                  | 3 296.83 | 3 204.4 | 3 238.59 | 2 525.80 | 2 579.09 |
| 19. | Kraków              | 3 420.62                                  | 3 333.63 | 3 187.4 | 3 245.24 | 2 910.09 | 2 668.89 |
| 20. | Krosno              | 3 577.11                                  | 3 362.18 | 3 212.6 | 3 274.22 | 3 043.40 | 2 754.40 |
| 21. | Legnica             | 3 227.83                                  | 3 071.67 | 2 900.1 | 2 973.88 | 2 590.46 | 2 314.82 |
| 22. | Lesko               | 3 371.37                                  | 3 194.58 | 2 989.0 | 3 089.09 | 2 663.01 | 2 325.30 |
| 23. | Leszno              | 3 655.03                                  | 3 484.99 | 3 398.3 | 3 431.68 | 3 213.76 | 2 851.01 |
| 24. | Lębork              | 3 554.34                                  | 3 349.36 | 3 241.3 | 3 280.64 | 2 990.94 | 2 675.65 |
| 25. | Lublin              | 3 612.82                                  | 3 438.81 | 3 304.1 | 3 353.83 | 3 082.35 | 2 860.71 |
| 26. | Łeba                | 3 596.92                                  | 3 387.75 | 3 265.4 | 3 311.22 | 3 008.61 | 2 673.96 |
| 27. | Łódź                | 3 510.97                                  | 3 362.74 | 3 196.2 | 3 272.20 | 2 955.22 | 2 657.52 |
| 28. | Mikołajki           | 3 912.41                                  | 3 724.46 | 3 574.9 | 3 633.95 | 3 359.16 | 2 924.54 |
| 29. | Mława               | 3 717.54                                  | 3 567.95 | 3 417.0 | 3 492.80 | 3 184.82 | 2 923.40 |
| 30. | Nowy Sącz           | 3 330.22                                  | 3 158.27 | 3 014.3 | 3 066.74 | 2 910.50 | 2 505.33 |
| 31. | Olsztyn             | 3 999.82                                  | 3 797.60 | 3 669.1 | 3 717.11 | 3 494.26 | 3 195.21 |
| 32. | Opole               | 3 211.62                                  | 3 037.73 | 2 900.4 | 2 955.28 | 2 616.13 | 2 301.74 |
| 33. | Ostrołęka           | 3 741.16                                  | 3 616.14 | 3 474.0 | 3 553.46 | 3 234.36 | 3 032.82 |
| 34. | Piła                | 3 598.96                                  | 3 232.77 | 3 063.3 | 3 135.67 | 2 804.38 | 2 563.89 |
| 35. | Płock               | 3 387.42                                  | 3 303.08 | 3 155.8 | 3 211.17 | 2 886.55 | 2 629.85 |
| 36. | Poznań              | 3 514.17                                  | 3 342.44 | 3 196.6 | 3 249.75 | 3 004.94 | 2 774.62 |
| 37. | Przemysł            | 3 627.09                                  | 3 459.88 | 3 333.9 | 3 381.40 | 3 096.78 | 2 847.54 |
| 38. | Racibórz            | 3 262.52                                  | 3 100.84 | 2 956.2 | 3 014.00 | 2 672.16 | 2 351.19 |
| 39. | Resko               | 3 331.15                                  | 3 134.25 | 3 014.6 | 3 066.95 | 2 625.30 | 2 293.51 |
| 40. | Rzeszów             | 3 670.28                                  | 3 519.20 | 3 383.1 | 3 433.52 | 3 205.62 | 2 911.84 |
| 41. | Sandomierz          | 3 429.71                                  | 3 276.93 | 3 132.1 | 3 184.66 | 2 885.08 | 2 624.78 |
| 42. | Siedlce             | 3 734.40                                  | 3 591.33 | 3 466.8 | 3 538.46 | 3 254.02 | 2 926.77 |
| 43. | Słubice             | 3 144.07                                  | 3 003.25 | 2 806.7 | 2 879.99 | 2 536.25 | 2 274.05 |
| 44. | Sulejów             | 3 579.98                                  | 3 415.15 | 3 271.8 | 3 342.04 | 3 031.67 | 2 735.60 |
| 45. | Suwałki             | 4 090.34                                  | 3 947.46 | 3 855.1 | 3 888.06 | 3 637.26 | 2 914.80 |

| No. | Location     | Number of heating degree days HDD [K·day] |          |         |          |          |          |
|-----|--------------|-------------------------------------------|----------|---------|----------|----------|----------|
|     |              | B3                                        | B2       | B1      | A3       | A2       | A1       |
| 46. | Szczecin     | 3 278.76                                  | 3 125.08 | 3 001.3 | 3 071.80 | 2 790.10 | 2 452.28 |
| 47. | Szczecinek   | 3 626.43                                  | 3 389.10 | 3 240.6 | 3 296.85 | 2 984.11 | 2 623.19 |
| 48. | Świnoujście  | 3 152.98                                  | 2 989.66 | 2 861.2 | 2 908.48 | 2 507.34 | 2 181.56 |
| 49. | Tarnów       | 3 128.96                                  | 2 963.29 | 2 716.9 | 2 812.77 | 2 402.19 | 2 167.28 |
| 50. | Terespol     | 3 628.98                                  | 3 409.92 | 3 252.0 | 3 317.75 | 3 034.35 | 2 817.39 |
| 51. | Toruń        | 3 496.95                                  | 3 360.24 | 3 293.4 | 3 317.34 | 3 063.99 | 2 741.55 |
| 52. | Ustka        | 3 605.05                                  | 3 369.52 | 3 212.0 | 3 268.88 | 2 971.42 | 2 548.19 |
| 53. | Warszawa     | 3 535.04                                  | 3 356.69 | 3 267.2 | 3 301.16 | 2 936.88 | 2 551.54 |
| 54. | Wieluń       | 3 433.76                                  | 3 276.26 | 3 112.3 | 3 201.92 | 2 740.48 | 2 411.08 |
| 55. | Włodawa      | 3 705.42                                  | 3 537.60 | 3 376.3 | 3 435.27 | 3 125.59 | 2 891.20 |
| 56. | Wrocław      | 3 456.15                                  | 3 314.15 | 3 177.4 | 3 246.39 | 2 877.22 | 2 583.34 |
| 57. | Zakopane     | 4 280.62                                  | 4 046.38 | 3 858.1 | 3 926.40 | 3 600.70 | 3 299.27 |
| 58. | Zamość       | 3 849.32                                  | 3 643.70 | 3 536.2 | 3 575.15 | 3 261.45 | 2 940.13 |
| 59. | Zielona Góra | 3 486.04                                  | 3 311.57 | 3 159.7 | 3 215.54 | 2 969.92 | 2 789.70 |

**Table S4. Indicators of the annual demand for usable energy for heating and ventilation  $EU_H$  for a building in class B3 [ $\text{kWh}/(\text{m}^2 \cdot \text{year})$ ]**

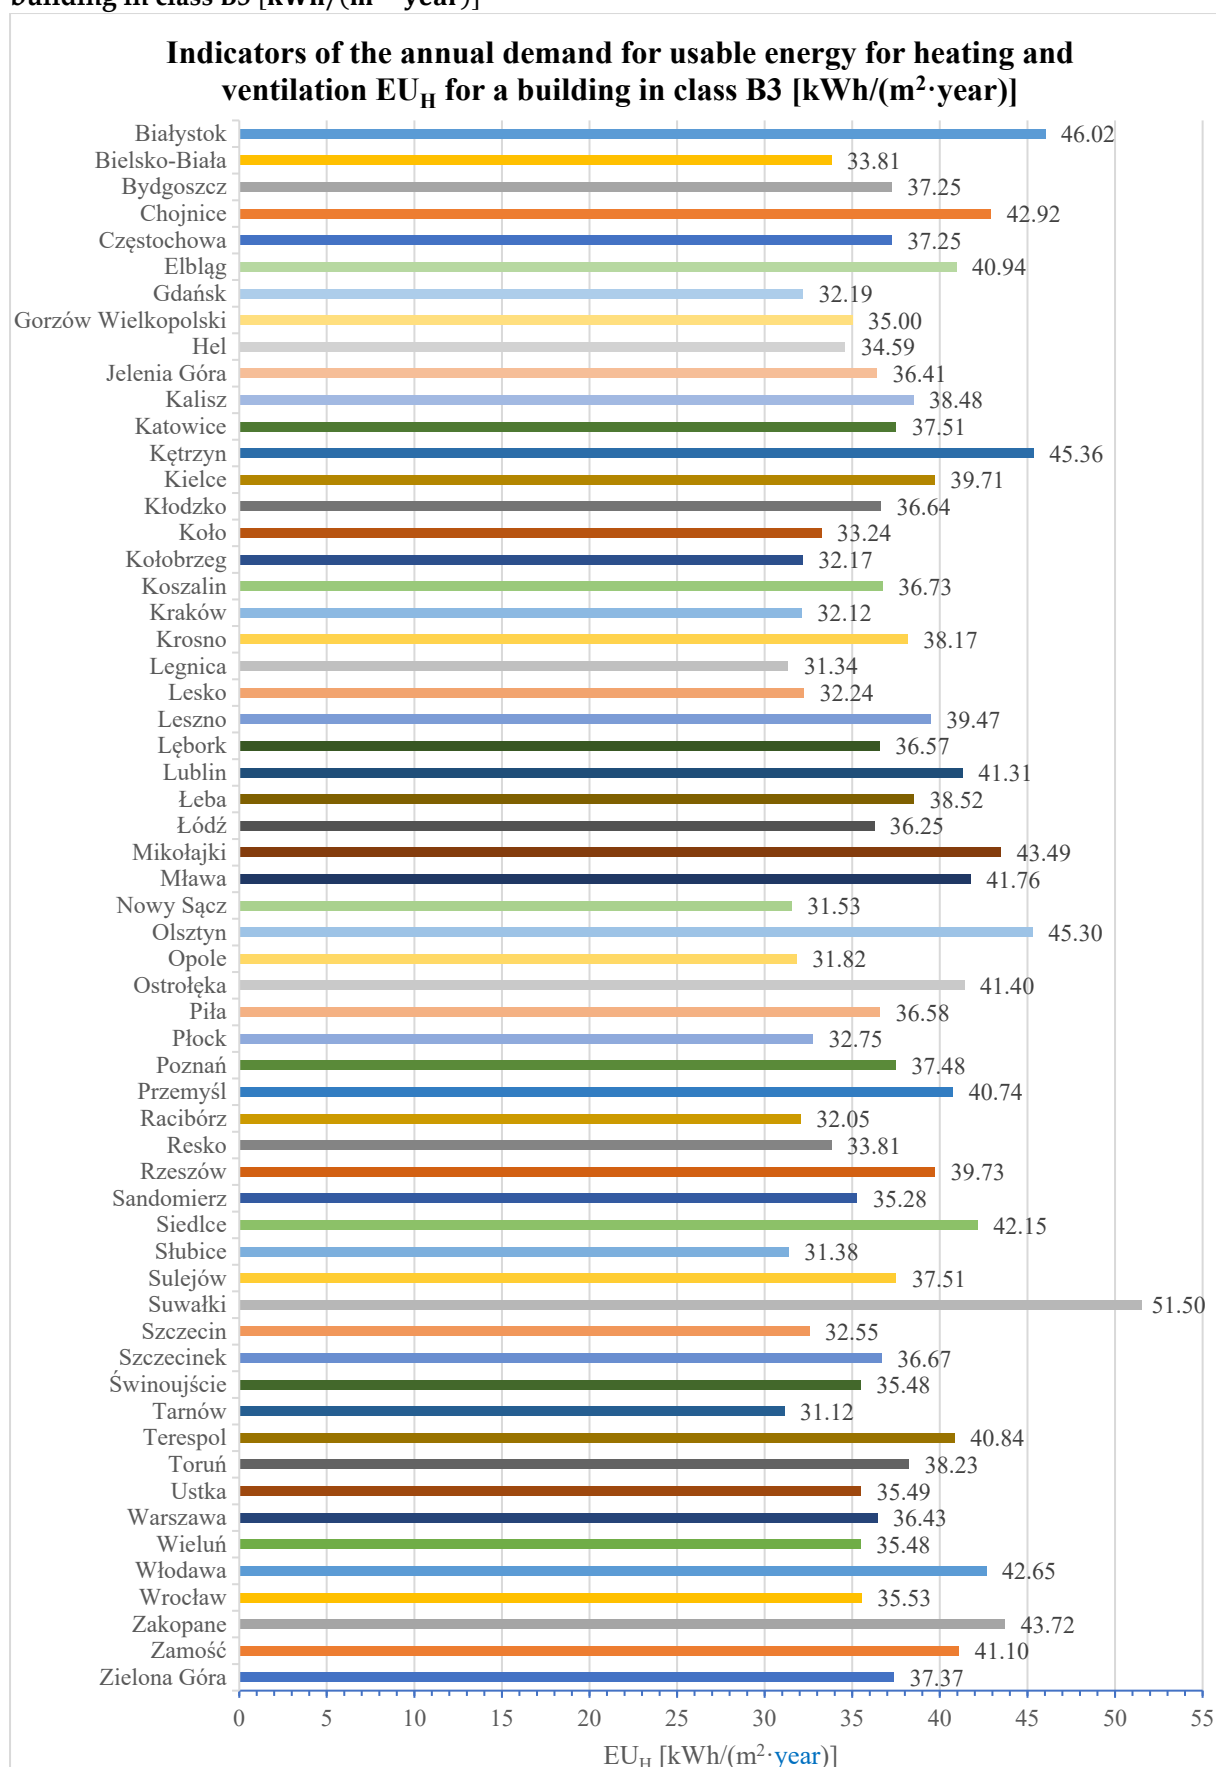

**Table S5. Indicators of the annual demand for usable energy for heating and ventilation  $EU_H$  for a building in class B2 [ $\text{kWh}/(\text{m}^2 \cdot \text{year})$ ]**

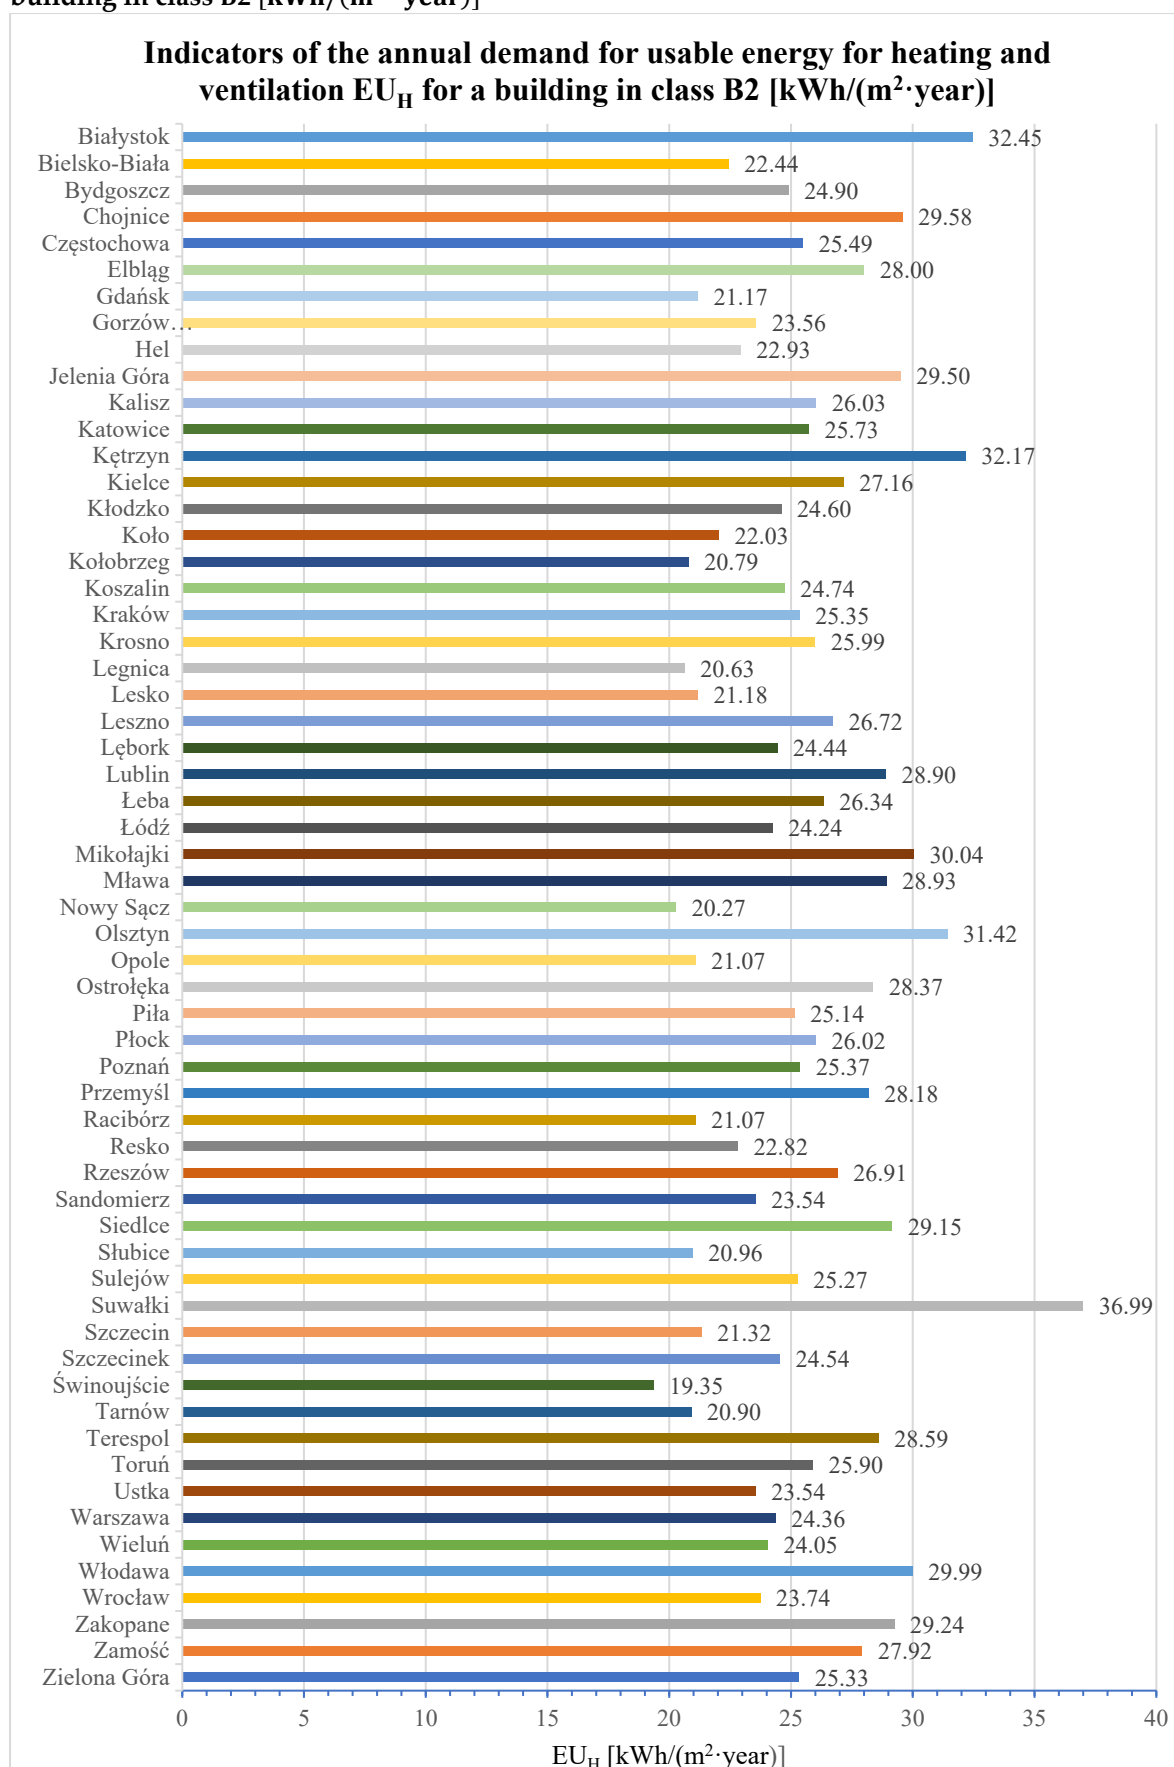

**Table S6. Indicators of the annual demand for usable energy for heating and ventilation  $EU_H$  for a building in class B1 [ $\text{kWh}/(\text{m}^2 \cdot \text{year})$ ]**

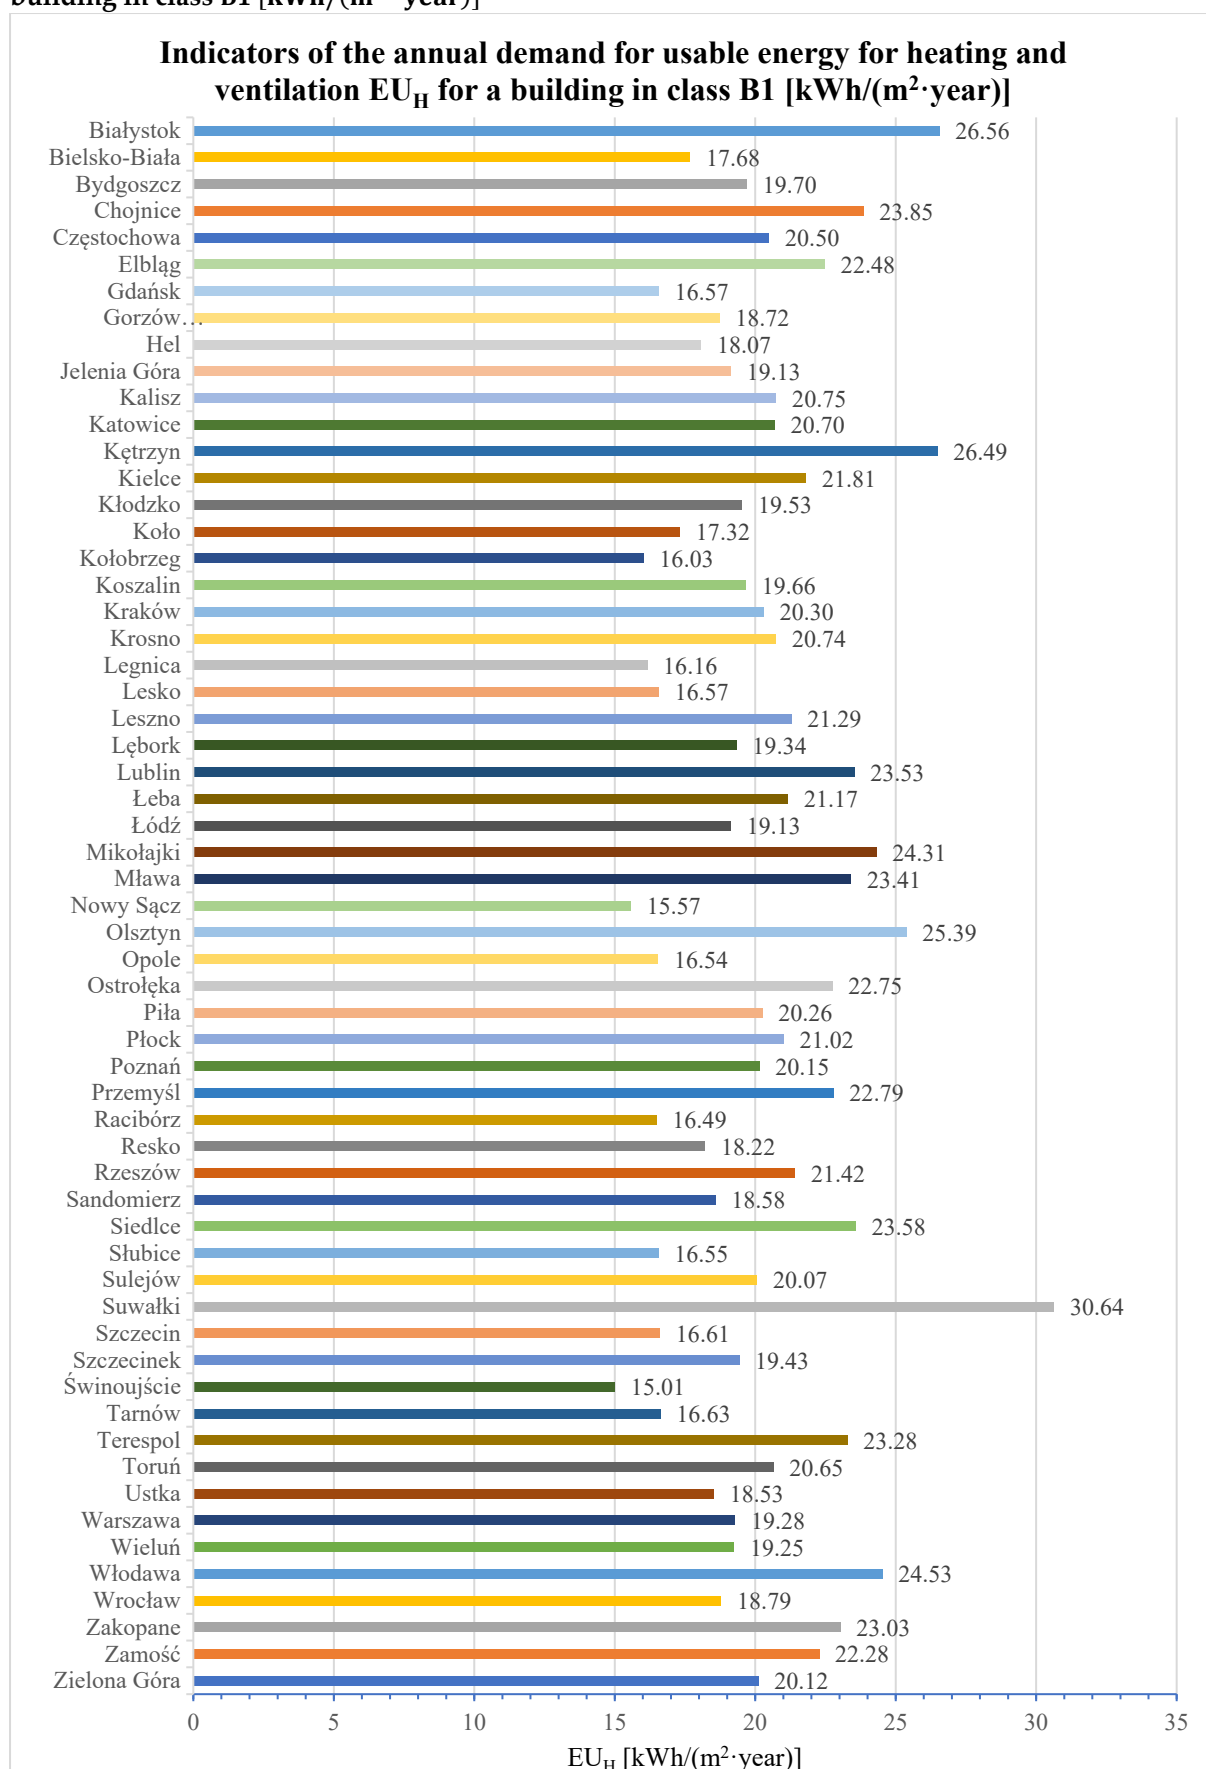



**Table S7. Indicators of the annual demand for usable energy for heating and ventilation  $EU_H$  for a building in class A3 [ $\text{kWh}/(\text{m}^2 \cdot \text{year})$ ]**

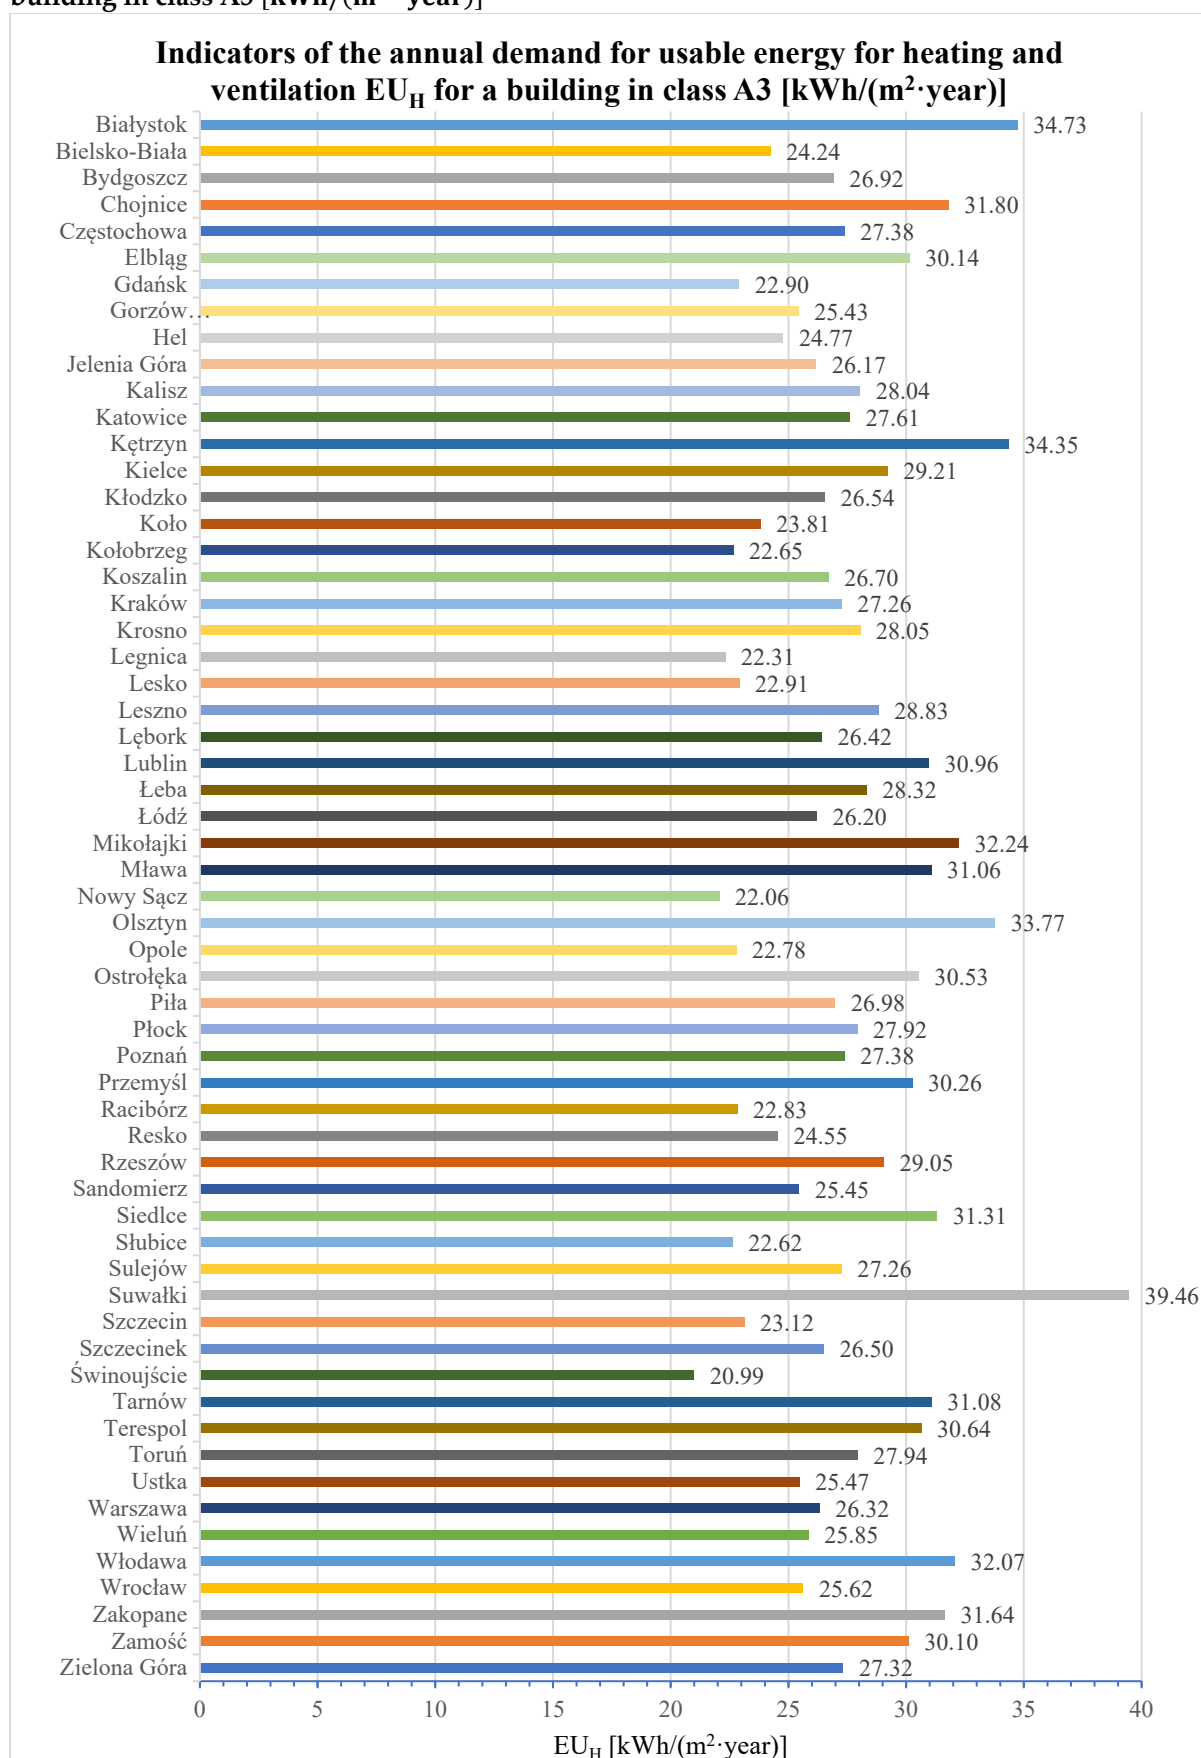

**Table S8. Indicators of the annual demand for usable energy for heating and ventilation  $EU_H$  for a building in class A2 [ $\text{kWh}/(\text{m}^2 \cdot \text{year})$ ]**

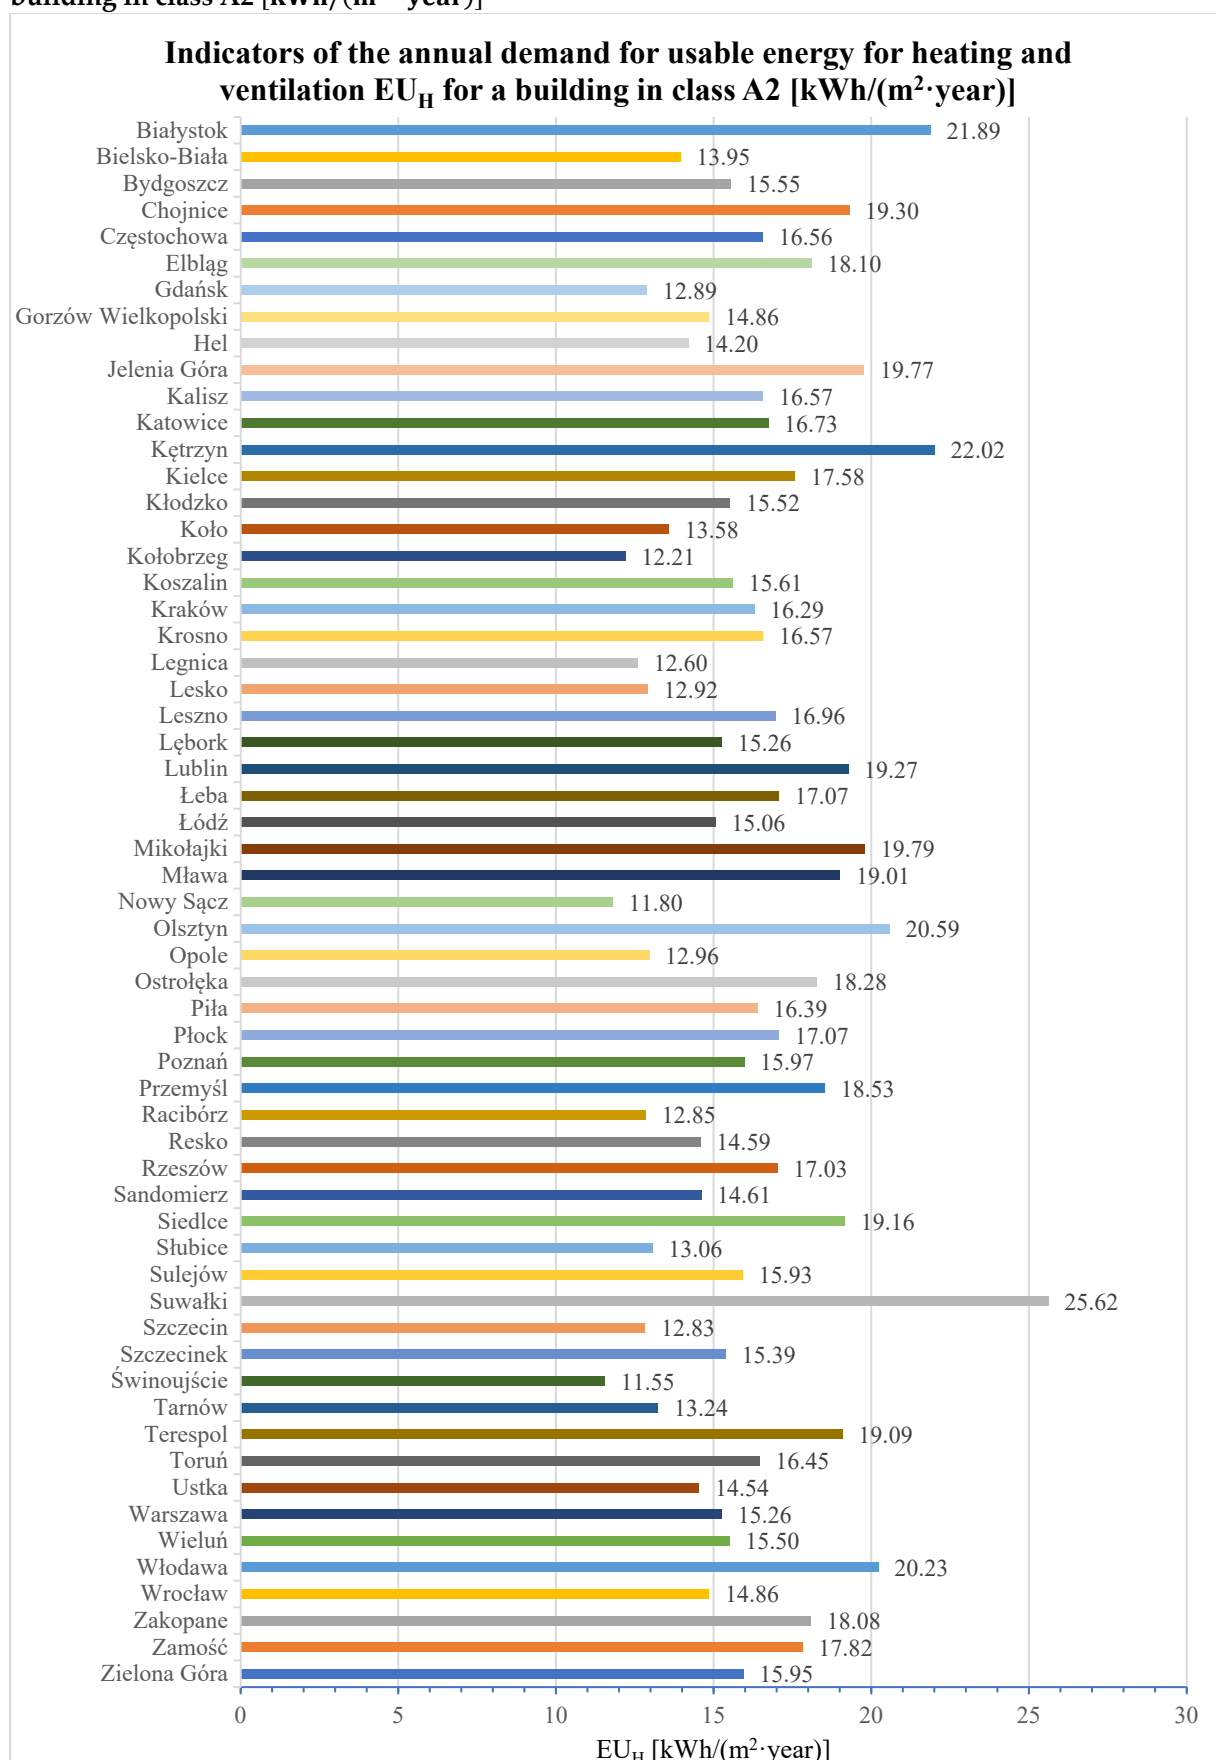

**Table S9. Indicators of the annual demand for usable energy for heating and ventilation  $EU_H$  for a building in class A1 [ $\text{kWh}/(\text{m}^2 \cdot \text{year})$ ]**

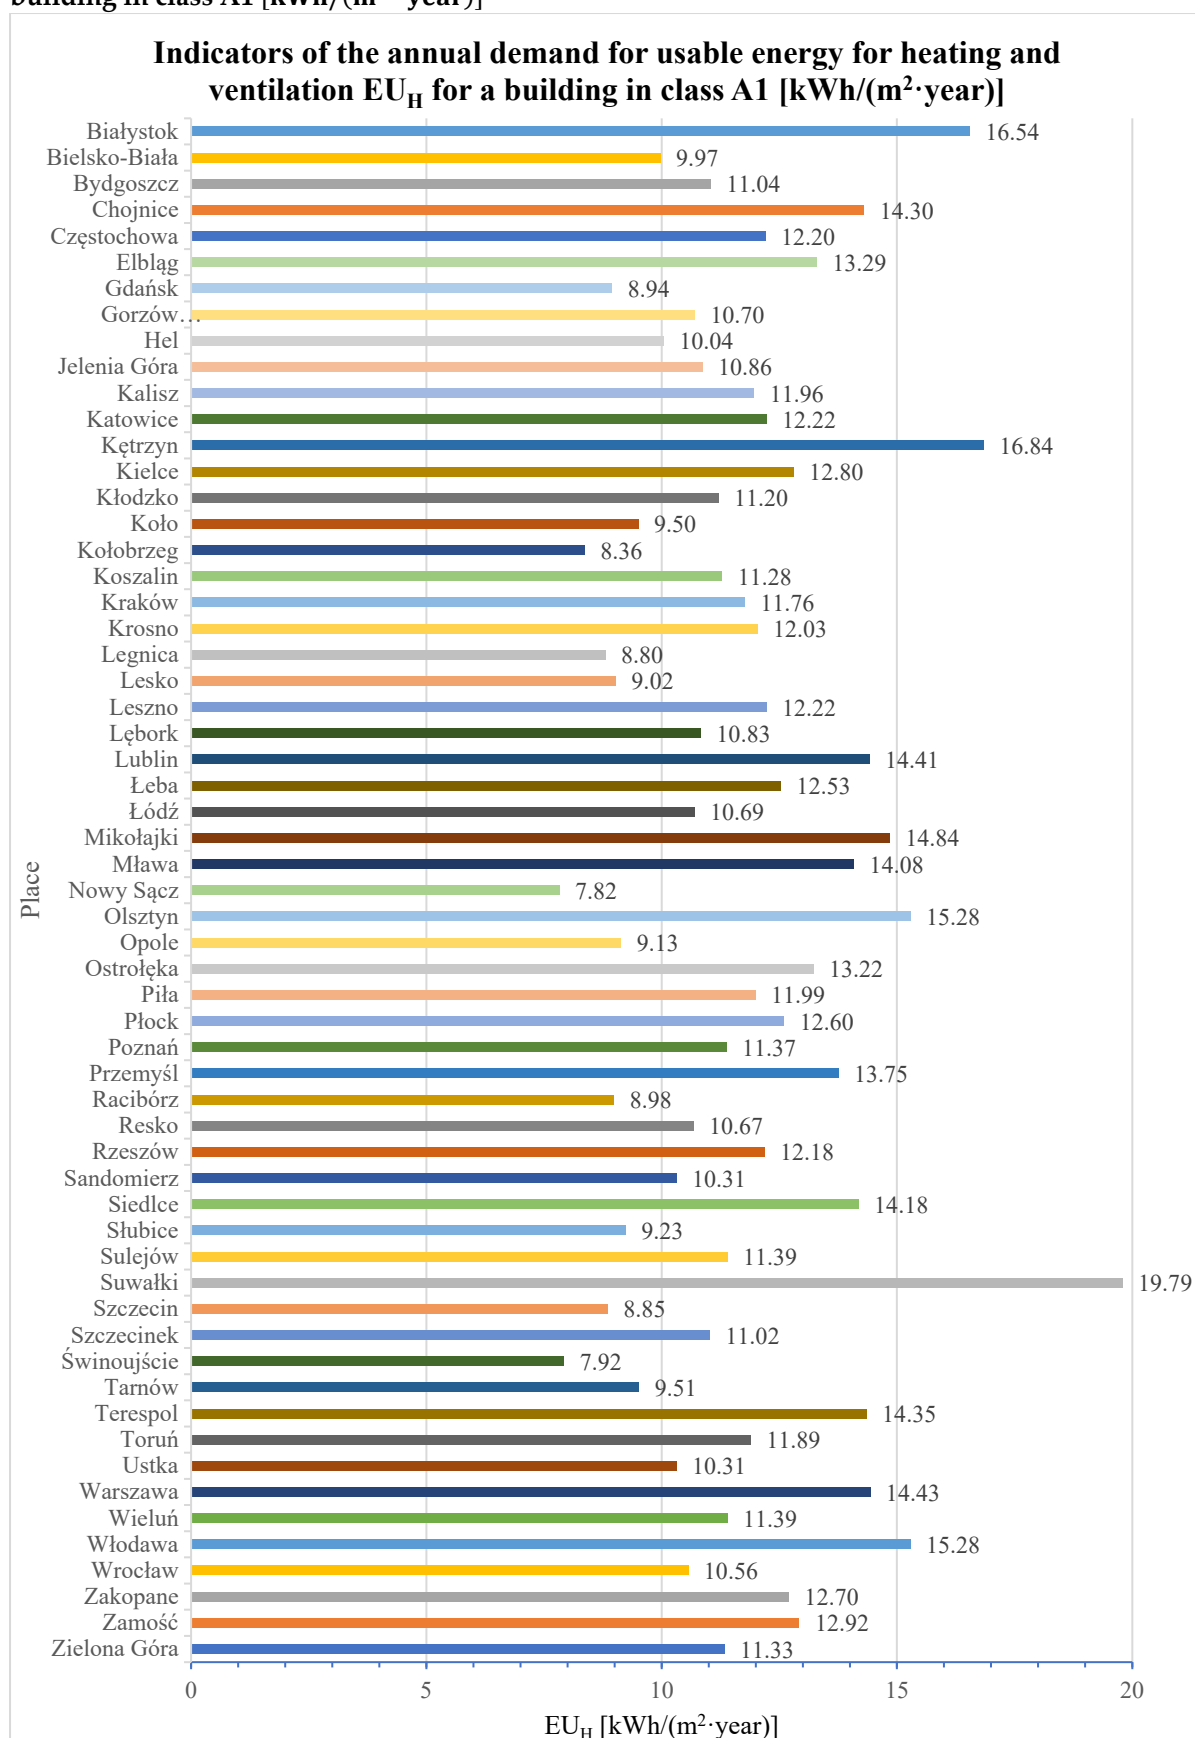

Supplement: s1 [file s1]
